# Supplementary material
Source: PubMed Central journal article supplement (PMC3431205)
Supplement: NIHMS366431-supplement-Supp__Data.pdf [file NIHMS366431-supplement-Supp__Data.pdf]

Web-Based Supplementary Materials for "Competing Risks Regression for Stratified Data" by Zhou, B., Latouche, A., Rocha, V., & Fine, J.

**Web Appendix A: Assumptions**

The following list of conditions are assumed throughout the paper:

1.  $\int_0^\tau \lambda_{k0}(t)dt < \infty$ .
2.  $\mathbf{Z}_{lki}(\cdot)$  ( $k = 1, \dots, s; i = 1, \dots, n_k$ ) have bounded total variations, i.e. for  $l$ th component of  $\mathbf{Z}_{ki}$ ,  $l = 1, \dots, m$ ,  $|\mathbf{Z}_{lki}(0)| + \int_0^\tau |d\mathbf{Z}_{lki}(t)| \leq M$ , where  $M$  is a constant.
3.  $\{N_{ki}(\cdot), Y_{ki}(\cdot), \mathbf{Z}_{ki}(\cdot), i = 1, \dots, n_k\}_{k=1, \dots, s}$  are independently distributed; for regular stratified data,  $\{N_{ki}(\cdot), Y_{ki}(\cdot), \mathbf{Z}_{ki}(\cdot)\}_{i=1, \dots, n_k}$  are independently and identically distributed for each stratum  $k$ .
4. regularity conditions for different regimes:

- For regular stratified data, there exists a neighborhood  $\mathcal{B}$  of  $\beta_0$  and scalar, vector and matrix functions  $s_k^{(0)}$ ,  $\mathbf{s}_k^{(1)}$  and  $\mathbf{s}_k^{(2)}$  defined on  $\mathcal{B} \times [0, \tau]$  such that for  $p = 0, 1, 2$ ,  $\sup_{t \in [0, \tau], \beta \in \mathcal{B}} \|\mathbf{S}_k^{(p)}(\beta, t) - \mathbf{s}_k^{(p)}(\beta, t)\| \xrightarrow{p} 0$ . Define  $\mathbf{e}_k = \mathbf{s}_k^{(1)}/s_k^{(0)}$  and  $\mathbf{v}_k = \mathbf{s}_k^{(2)}/s_k^{(0)} - \mathbf{e}_k^{\otimes 2}$ .

The matrix  $\Sigma_{k\tau} = \int_0^\tau \mathbf{v}_k(\beta_0, t) s_k^{(0)}(\beta_0, t) \lambda_{0k}(t) dt$  is positive definite.

- For highly stratified data, both

$$\mathbf{I} \equiv \lim_{s \rightarrow \infty} s^{-1} \sum_{k=1}^s \mathbb{E} \left[ \sum_{i=1}^{n_k} \int_0^\tau \{\mathbf{Z}_{ki}(u) - \bar{\mathbf{Z}}_k(\beta_0, u)\}^{\otimes 2} Y_{ki}^*(u) e^{\beta_0' \mathbf{Z}_{ki}(u)} \frac{d\bar{N}_k(u)}{S_k^{(0)}(\beta_0, u)} \right]$$

for censoring complete case and

$$\tilde{\mathbf{I}} \equiv \lim_{s \rightarrow \infty} s^{-1} \sum_{k=1}^s \mathbb{E} \left[ \sum_{i=1}^{n_k} \int_0^\tau \{\mathbf{Z}_{ki}(u) - \tilde{\mathbf{Z}}_k(\beta_0, u)\}^{\otimes 2} w_{ki}(u) Y_{ki}(u) e^{\beta_0' \mathbf{Z}_{ki}(u)} \frac{d\bar{N}_k(u)}{\tilde{S}_k^{(0)}(\beta_0, u)} \right]$$

for right censored case are positive definite.

## Web Appendix B: Consistency of $\widehat{\beta}$ for Censoring Complete Highly Stratified Data

Let  $C(\beta, t)$  be the logarithm of the partial likelihood evaluated at time  $t$ , so we have

$$C(\beta, t) = \sum_{k=1}^s \left[ \sum_{i=1}^{n_k} \int_0^t \beta' \mathbf{Z}_{ki}(u) dN_{ki}(u) - \int_0^t \left\{ \log \sum_{i'=1}^{n_k} Y_{ki'}^*(u) e^{\beta' \mathbf{Z}_{ki'}(u)} \right\} d\bar{N}_k(u) \right],$$

where  $\bar{N}_k = \sum_{i=0}^{n_k} N_{ki}$  and  $n_k$  is finite. We also have  $C(\beta, \tau) = \log L(\beta)$ .  $\widehat{\beta}$  is the solution to the estimating equation  $(\partial/\partial\beta)C(\beta, \tau) = 0$ .

Consider the process

$$\begin{aligned} X(\beta, t) &= s^{-1}(C(\beta, t) - C(\beta_0, t)) \\ &= s^{-1} \sum_{k=1}^s \left[ \sum_{i=1}^{n_k} \int_0^t (\beta - \beta_0)' \mathbf{Z}_{ki}(u) dN_{ki}(u) - \int_0^t \log \left\{ \frac{\sum_{i'=1}^{n_k} Y_{ki'}^*(u) e^{\beta' \mathbf{Z}_{ki'}(u)}}{\sum_{i'=1}^{n_k} Y_{ki'}^*(u) e^{\beta_0' \mathbf{Z}_{ki'}(u)}} \right\} d\bar{N}_k(u) \right] \\ &= s^{-1} \sum_{k=1}^s \left[ \sum_{i=1}^{n_k} \int_0^t (\beta - \beta_0)' \mathbf{Z}_{ki}(u) dN_{ki}(u) - \int_0^t \log \left\{ \frac{S_k^{(0)}(\beta, u)}{S_k^{(0)}(\beta_0, u)} \right\} d\bar{N}_k(u) \right]. \end{aligned}$$

where  $S_k^{(p)}(\beta, t) = n_k^{-1} \sum_{i=1}^{n_k} Y_{ki}^*(t) \mathbf{Z}_{ki}(t)^{\otimes p} e^{\beta' \mathbf{Z}_{ki}(t)}$ ,  $p = 0, 1, 2$ . Define

$$X_k(\beta, t) = \sum_{i=1}^{n_k} \int_0^t (\beta - \beta_0)' \mathbf{Z}_{ki}(u) dN_{ki}(u) - \int_0^t \log \left\{ \frac{S_k^{(0)}(\beta, u)}{S_k^{(0)}(\beta_0, u)} \right\} d\bar{N}_k(u), \quad k = 1, \dots, s.$$

Then,  $X(\beta, t) = s^{-1} \sum_{k=1}^s X_k(\beta, t)$ . For convenience, we suppress  $t$  at  $t = \tau$  in these expressions. Hence,  $X_k(\beta, \tau) = X_k(\beta)$ , and  $X(\beta, \tau) = X(\beta)$ .

Suppose  $\mathcal{X}_k(\beta) = E\{X_k(\beta)\}$  and  $\mathcal{X}(\beta) = \lim_{s \rightarrow \infty} s^{-1} \sum_{k=1}^s \mathcal{X}_k(\beta)$ .

The conditions 1 and 2 lead to the fact that  $d\bar{N}_k(t)$  and  $S_k^{(0)}(\beta, t)$  have bounded variation (Lin *et al.*, 2000). This result and the finiteness of strata sizes  $n_k$ 's can be used to show that  $X_k(\beta)$ ,  $k = 1, \dots, s$  are bounded. As a result,  $s^{-1} \sum_{k=1}^s E\{|X_k(\beta) - \mathcal{X}_k(\beta)|^2\} \leq \max_{k \in \{1, \dots, s\}} E\{|X_k(\beta) - \mathcal{X}_k(\beta)|^2\}$  is bounded. Hence,  $s^{-2} \sum_{k=1}^s E\{|X_k(\beta) - \mathcal{X}_k(\beta)|^2\} \rightarrow 0$ . In addition, the condition 3 guarantees the independence of  $X_k(\beta)$ 's. Therefore, By Kolmogorov Strong Law of Large Numbers,  $X(\beta)$  converges to  $\mathcal{X}(\beta)$  almost surely, for all  $\beta \in \mathcal{B}$ , where  $\mathcal{B}$  is any compact neighborhood of  $\beta_0$  (Sen and Singer, 1993, chap.2).

$X_k(\boldsymbol{\beta})$  is random concave by Anderson and Gill (1982). Therefore,  $X(\boldsymbol{\beta})$  is a random concave function since it is just a sum of random concave functions. This implies the uniform convergence of  $X(\boldsymbol{\beta})$  to  $\mathcal{X}(\boldsymbol{\beta})$  on compact subspaces  $\boldsymbol{\beta} \in \mathcal{B}$ . That is,  $\sup_{\boldsymbol{\beta} \in \mathcal{B}} |X(\boldsymbol{\beta}) - \mathcal{X}(\boldsymbol{\beta})| \rightarrow_p 0$  (Rockafellar, 1970, Theorem 10.8).

Now by the boundedness conditions and the independence of range of integral on  $\boldsymbol{\beta}$ , we can evaluate the first and second derivatives of  $\mathcal{X}(\boldsymbol{\beta})$  by taking partial derivatives inside the integral and expectation. Clearly, the first derivative evaluated at  $\boldsymbol{\beta}_0$  is  $\frac{\partial \mathcal{X}(\boldsymbol{\beta})}{\partial \boldsymbol{\beta}} \Big|_{\boldsymbol{\beta}=\boldsymbol{\beta}_0} = 0$ , since the expected value of the score function  $(\partial/\partial \boldsymbol{\beta})C(\boldsymbol{\beta}, \tau)$  equals to 0 at  $\boldsymbol{\beta} = \boldsymbol{\beta}_0$ . Furthermore,

$$\frac{\partial^2 \mathcal{X}(\boldsymbol{\beta})}{\partial \boldsymbol{\beta}^2} = - \lim_{s \rightarrow \infty} s^{-1} \sum_{k=1}^s \text{E} \left[ \sum_{i=1}^{n_k} \int_0^\tau \{ \mathbf{Z}_{ki}(u) - \bar{\mathbf{Z}}_k(\boldsymbol{\beta}, u) \}^{\otimes 2} Y_{ki}^*(u) e^{\boldsymbol{\beta}' \mathbf{Z}_{ki}(u)} \frac{d\bar{N}_k(u)}{S_k^{(0)}(\boldsymbol{\beta}, u)} \right], \quad (\text{A.1})$$

which equals to  $\mathbf{I}$  when evaluated at  $\boldsymbol{\beta}_0$ . By condition 4, (A.1) is negative definite. Therefore,  $\mathcal{X}(\boldsymbol{\beta})$  is a concave function of  $\boldsymbol{\beta}$  with a unique maximum at  $\boldsymbol{\beta}_0$ . Thus, the maximizer of  $X(\boldsymbol{\beta}) : \hat{\boldsymbol{\beta}}$  converges in probability to the unique maximum of  $\mathcal{X}(\boldsymbol{\beta}) : \boldsymbol{\beta}_0$  (Anderson and Gill, 1982, Corollary II.2).

### Web Appendix C.1: Consistency of $\hat{\boldsymbol{\beta}}$ for Right Censored Highly Stratified Data

When the highly stratified data are right censored, we show the consistency of  $\hat{\boldsymbol{\beta}}$  by modifying the proof in Appendix A. Note that the risk process  $Y^*(t) = I(C \geq t)Y(t)$  is replaced by  $\hat{Y}(t) = \hat{w}(t)Y(t)$ , where  $\hat{w}(t) = I(C \geq T \wedge t)\hat{G}(t)/\hat{G}(X \wedge t)$ . Thus, we have

$$\tilde{C}(\boldsymbol{\beta}, t) = \sum_{k=1}^s \left[ \sum_{i=1}^{n_k} \int_0^t \boldsymbol{\beta}' \mathbf{Z}_{ki}(u) dN_{ki}(u) - \int_0^t \left\{ \log \sum_{i'=1}^{n_k} \hat{w}_{ki'}(u) Y_{ki'}(t) e^{\boldsymbol{\beta}' \mathbf{Z}_{ki'}(u)} \right\} d\bar{N}_k(u) \right].$$

Since  $\hat{w}(t) \rightarrow w(t) = I(C \geq T \wedge t)G(t)/G(X \wedge t)$ , where  $G(t) = Pr(C_{ki} \geq T)$ ,  $k = 1, \dots, s$ ;  $i =$

$1, \dots, n_k$ , we further have

$$\tilde{C}(\boldsymbol{\beta}, t) = \sum_{k=1}^s \left[ \sum_{i=1}^{n_k} \int_0^t \boldsymbol{\beta}' \mathbf{Z}_{ki}(u) dN_{ki}(u) - \int_0^t \left\{ \log \sum_{i'=1}^{n_k} w_{ki'}(u) Y_{ki'}(u) e^{\boldsymbol{\beta}' \mathbf{Z}_{ki'}(u)} \right\} d\bar{N}_k(u) \right] + o_p(1).$$

Hence,

$$\begin{aligned} & \tilde{X}(\boldsymbol{\beta}, t) \\ &= s^{-1} (\tilde{C}(\boldsymbol{\beta}, t) - \tilde{C}(\boldsymbol{\beta}_0, t)) \\ &= s^{-1} \sum_{k=1}^s \left[ \sum_{i=1}^{n_k} \int_0^t (\boldsymbol{\beta} - \boldsymbol{\beta}_0)' \mathbf{Z}_{ki}(u) dN_{ki}(u) - \int_0^t \log \left\{ \frac{\sum_{i'=1}^{n_k} w_{ki'}(u) Y_{ki'}(u) e^{\boldsymbol{\beta}' \mathbf{Z}_{ki'}(u)}}{\sum_{i'=1}^{n_k} w_{ki'}(u) Y_{ki'}(u) e^{\boldsymbol{\beta}_0' \mathbf{Z}_{ki'}(u)}} \right\} d\bar{N}_k(u) \right] + o_p(1) \\ &= s^{-1} \sum_{k=1}^s \left[ \sum_{i=1}^{n_k} \int_0^t (\boldsymbol{\beta} - \boldsymbol{\beta}_0)' \mathbf{Z}_{ki}(u) dN_{ki}(u) - \int_0^t \log \left\{ \frac{\tilde{\mathbf{S}}_k^{(0)}(\boldsymbol{\beta}, u)}{\tilde{\mathbf{S}}_k^{(0)}(\boldsymbol{\beta}_0, u)} \right\} d\bar{N}_k(u) \right] + o_p(1), \end{aligned}$$

where

$$\tilde{\mathbf{S}}_k^{(p)}(\boldsymbol{\beta}_0, t) = n_k^{-1} \sum_{i=1}^{n_k} w_{ki}(t) Y_{ki}(t) \mathbf{Z}_{ki}(t)^{\otimes p} e^{\boldsymbol{\beta}_0' \mathbf{Z}_{ki}(t)}, \quad p = 0, 1, 2.$$

Correspondingly,

$$\tilde{X}_k(\boldsymbol{\beta}, t) = \sum_{i=1}^{n_k} \int_0^t (\boldsymbol{\beta} - \boldsymbol{\beta}_0)' \mathbf{Z}_{ki}(u) dN_{ki}(u) - \int_0^t \log \left\{ \frac{\tilde{\mathbf{S}}_k^{(0)}(\boldsymbol{\beta}, u)}{\tilde{\mathbf{S}}_k^{(0)}(\boldsymbol{\beta}_0, u)} \right\} d\bar{N}_k(u),$$

$$\tilde{\mathcal{X}}_k(\boldsymbol{\beta}) = \mathbb{E} \left\{ \tilde{X}_k(\boldsymbol{\beta}) \right\}, \quad \text{and}$$

$$\tilde{\mathcal{X}}(\boldsymbol{\beta}) = \lim_{s \rightarrow \infty} s^{-1} \sum_{k=1}^s \tilde{\mathcal{X}}_k(\boldsymbol{\beta}).$$

Since  $w(t)Y(t) \leq I(C \geq t)Y(t)$ ,  $\tilde{\mathbf{S}}_k^{(0)}(\boldsymbol{\beta}, t) \leq S_k^{(0)}(\boldsymbol{\beta}, t)$ . We can show  $\tilde{X}_k(\boldsymbol{\beta}), k = 1, \dots, s$  are bounded using the boundedness results from appendix A. Therefore,  $s^{-1} \sum_{k=1}^s \mathbb{E} \left\{ |\tilde{X}_k(\boldsymbol{\beta}) - \tilde{\mathcal{X}}_k(\boldsymbol{\beta})|^2 \right\} \leq \max_{k \in \{1, \dots, s\}} \mathbb{E} \left\{ |\tilde{X}_k(\boldsymbol{\beta}) - \tilde{\mathcal{X}}_k(\boldsymbol{\beta})|^2 \right\}$  is bounded. Hence,  $s^{-2} \sum_{k=1}^s \mathbb{E} \left\{ |\tilde{X}_k(\boldsymbol{\beta}) - \tilde{\mathcal{X}}_k(\boldsymbol{\beta})|^2 \right\} \rightarrow 0$ . In addition, condition 3 guarantees the independence of  $\tilde{X}_k(\boldsymbol{\beta})$ 's. Therefore, By Kolmogorov Strong Law of Large Numbers,  $\tilde{X}(\boldsymbol{\beta})$  converges to  $\tilde{\mathcal{X}}(\boldsymbol{\beta})$  almost surely, for all  $\boldsymbol{\beta} \in \mathcal{B}$ , where  $\mathcal{B}$  is any compact neighborhood of  $\boldsymbol{\beta}_0$  (Sen and Singer, 1993, chap.2).

The uniform convergence is showed next.

$$\frac{\partial^2 \tilde{X}(\boldsymbol{\beta})}{\partial \boldsymbol{\beta}^2} = -s^{-1} \sum_{k=1}^s \left[ \sum_{i=1}^{n_k} \int_0^\tau \left\{ \mathbf{z}_{ki}(u) - \tilde{\mathbf{Z}}_k(\boldsymbol{\beta}, u) \right\}^{\otimes 2} w_{ki}(u) Y_{ki}(u) e^{\boldsymbol{\beta}' \mathbf{z}_{ki}(u)} \frac{d\bar{N}_k(u)}{\tilde{\mathbf{S}}_k^{(0)}(\boldsymbol{\beta}, u)} \right], \quad (\text{A.2})$$

where  $\tilde{\mathbf{Z}}_k(\boldsymbol{\beta}_0, t) = \tilde{\mathbf{S}}_k^{(1)}(\boldsymbol{\beta}_0, t) / \tilde{\mathbf{S}}_k^{(0)}(\boldsymbol{\beta}_0, t)$ . Since  $w_{ki}(u) Y_{ki}(u)$ ,  $d\bar{N}_k(u)$  and  $\tilde{\mathbf{S}}_k^{(0)}(\boldsymbol{\beta}, u)$  are all nonnegative, (A.2) is negative semidefinite. Thus,  $\tilde{X}(\boldsymbol{\beta})$  is a random concave function.

Now by the boundedness conditions and the independence of range of integral on  $\boldsymbol{\beta}$ , we can evaluate the first and second derivatives of  $\tilde{\mathcal{X}}(\boldsymbol{\beta})$  by taking partial derivatives inside the integral and expectation. Clearly, the first derivative evaluated at  $\boldsymbol{\beta}_0$  is  $\frac{\partial \tilde{\mathcal{X}}(\boldsymbol{\beta})}{\partial \boldsymbol{\beta}} \Big|_{\boldsymbol{\beta}=\boldsymbol{\beta}_0} = 0$ , since the expected value of the score function  $(\partial/\partial \boldsymbol{\beta}) \tilde{C}(\boldsymbol{\beta}, \tau)$  equals to 0 at  $\boldsymbol{\beta} = \boldsymbol{\beta}_0$ . Furthermore,

$$\frac{\partial^2 \tilde{\mathcal{X}}(\boldsymbol{\beta})}{\partial \boldsymbol{\beta}^2} = - \lim_{s \rightarrow \infty} s^{-1} \sum_{k=1}^s \text{E} \left[ \sum_{i=1}^{n_k} \int_0^\tau \left\{ \mathbf{z}_{ki}(u) - \tilde{\mathbf{Z}}_k(\boldsymbol{\beta}, u) \right\}^{\otimes 2} w_{ki}(u) Y_{ki}(u) e^{\boldsymbol{\beta}' \mathbf{z}_{ki}(u)} \frac{d\bar{N}_k(u)}{\tilde{\mathbf{S}}_k^{(0)}(\boldsymbol{\beta}, u)} \right], \quad (\text{A.3})$$

which equals to  $\tilde{\mathbf{I}}$  when evaluated at  $\boldsymbol{\beta}_0$ . By condition 4, (A.3) is negative definite. Therefore,  $\tilde{\mathcal{X}}(\boldsymbol{\beta})$  is a concave function of  $\boldsymbol{\beta}$  with a unique maximum at  $\boldsymbol{\beta}_0$ . Thus, the maximizer of  $\tilde{\mathcal{X}}(\boldsymbol{\beta}) : \hat{\boldsymbol{\beta}}$  converges in probability to the unique maximum of  $\tilde{\mathcal{X}}(\boldsymbol{\beta}) : \boldsymbol{\beta}_0$  (Anderson and Gill, 1982, Corollary II.2).

## Web Appendix C.2: Asymptotic Normality of $s^{-\frac{1}{2}} U_1(\boldsymbol{\beta}_0, t)$ for Highly Stratified Right Censored Data

Rewrite equation (3):  $U_1(\boldsymbol{\beta}_0, t) = \sum_{k=1}^s \sum_{i=1}^{n_k} \int_0^t \left\{ \mathbf{z}_{ki}(u) - \hat{\mathbf{Z}}_k(\boldsymbol{\beta}_0, u) \right\} \hat{w}_{ki}(u) dN_{ki}(\boldsymbol{\beta}_0, u)$

as

$$\begin{aligned} U_1(\boldsymbol{\beta}_0, t) &= \sum_{k=1}^s \sum_{i=1}^{n_k} \int_0^t \left\{ \mathbf{z}_{ki}(u) - \tilde{\mathbf{Z}}_k(\boldsymbol{\beta}_0, u) \right\} \hat{w}_{ki}(u) dN_{ki}(\boldsymbol{\beta}_0, u) \\ &\quad + \sum_{k=1}^s \sum_{i=1}^{n_k} \int_0^t \left\{ \tilde{\mathbf{Z}}_k(\boldsymbol{\beta}_0, u) - \hat{\mathbf{Z}}_k(\boldsymbol{\beta}_0, u) \right\} \hat{w}_{ki}(u) dN_{ki}(\boldsymbol{\beta}_0, u), \end{aligned} \quad (\text{A.4})$$

where

$$\begin{aligned}\widehat{\mathbf{S}}_k^{(p)}(\boldsymbol{\beta}, t) &= n_k^{-1} \sum_{i=1}^{n_k} \widehat{w}_{ki}(t) Y_{ki}(t) \mathbf{Z}_{ki}(t)^{\otimes p} e^{\boldsymbol{\beta}' \mathbf{z}_{ki}(t)}, \quad p = 0, \dots, 2, \\ \widehat{\mathbf{Z}}_k(\boldsymbol{\beta}, t) &= \widehat{\mathbf{S}}_k^{(1)}(\boldsymbol{\beta}, t) / \widehat{\mathbf{S}}_k^{(0)}(\boldsymbol{\beta}, t), \\ \widetilde{\mathbf{S}}_k^{(p)}(\boldsymbol{\beta}, t) &= n_k^{-1} \sum_{i=1}^{n_k} w_{ki}(t) Y_{ki}(t) \mathbf{Z}_{ki}(t)^{\otimes p} e^{\boldsymbol{\beta}' \mathbf{z}_{ki}(t)}, \quad p = 0, \dots, 2, \\ \widetilde{\mathbf{Z}}_k(\boldsymbol{\beta}, t) &= \widetilde{\mathbf{S}}_k^{(1)}(\boldsymbol{\beta}, t) / \widetilde{\mathbf{S}}_k^{(0)}(\boldsymbol{\beta}, t).\end{aligned}$$

Clearly,

$$\text{first part of (A.4)} = \sum_{k=1}^s \sum_{i=1}^{n_k} \int_0^t \left\{ \mathbf{z}_{ki}(u) - \widetilde{\mathbf{Z}}_k(\boldsymbol{\beta}_0, u) \right\} w_{ki}(u) dN_{ki}(\boldsymbol{\beta}_0, u)$$

since  $\widehat{w}_{ki}(u) dN_{ki}(\boldsymbol{\beta}_0, u) = w_{ki}(u) dN_{ki}(\boldsymbol{\beta}_0, u)$ .

We can now write

$$s^{-1} \mathbf{U}_1(\boldsymbol{\beta}_0, t) = s^{-1} \sum_{k=1}^s \widetilde{\mathbf{U}}_{1k}(\boldsymbol{\beta}_0, t) + \mathbf{H}(\boldsymbol{\beta}_0, t)$$

where  $\widetilde{\mathbf{U}}_{1k}(\boldsymbol{\beta}_0, t) = \sum_{i=1}^{n_k} \int_0^t \left\{ \mathbf{z}_{ki}(u) - \widetilde{\mathbf{Z}}_k(\boldsymbol{\beta}_0, u) \right\} w_{ki}(u) dN_{ki}(\boldsymbol{\beta}_0, u)$ , and  $\mathbf{H}(\boldsymbol{\beta}_0, t)$  is the second part of (A.4).

A first-order Taylor expansion of  $\widetilde{\mathbf{Z}}_k(\boldsymbol{\beta}_0, u) - \widehat{\mathbf{Z}}_k(\boldsymbol{\beta}_0, u)$  w.r.t.  $\widehat{w}_{ki}(u)$  around  $w_{ki}(u)$ ,  $i = 1, \dots, n_k$  gives:

$$\widehat{\mathbf{Z}}_k(\boldsymbol{\beta}_0, u) - \widetilde{\mathbf{Z}}_k(\boldsymbol{\beta}_0, u) \approx \sum_{j=1}^{n_k} \mathbf{A}_j(\boldsymbol{\beta}_0, u) \{ \widehat{w}_{kj}(u) - w_{kj}(u) \}$$

where

$$\begin{aligned}\mathbf{A}_{kj}(\boldsymbol{\beta}_0, u) &= \frac{Y_{kj}(u) \mathbf{Z}_{kj}(u) e^{\boldsymbol{\beta}'_0 \mathbf{z}_{kj}(t)}}{n \widetilde{\mathbf{S}}_k^{(0)}(\boldsymbol{\beta}_0, u)} - \frac{Y_{kj}(u) e^{\boldsymbol{\beta}'_0 \mathbf{z}_{kj}(t)}}{n \widetilde{\mathbf{S}}_k^{(0)}(\boldsymbol{\beta}_0, u)} \times \frac{\widetilde{\mathbf{S}}_k^{(1)}(\boldsymbol{\beta}_0, t)}{\widetilde{\mathbf{S}}_k^{(0)}(\boldsymbol{\beta}_0, t)} \\ &= \frac{Y_{kj}(u) e^{\boldsymbol{\beta}'_0 \mathbf{z}_{kj}(t)}}{n \widetilde{\mathbf{S}}_k^{(0)}(\boldsymbol{\beta}_0, u)} \times \left\{ \mathbf{z}_{kj}(u) - \widetilde{\mathbf{Z}}_k(\boldsymbol{\beta}_0, u) \right\}\end{aligned}$$

Therefore,

$$\mathbf{H}(\boldsymbol{\beta}_0, t) = -s^{-1} \sum_{k=1}^s \sum_{i=1}^{n_k} \int_0^t \sum_{j=1}^{n_k} \mathbf{A}_{kj}(\boldsymbol{\beta}_0, u) \{ \widehat{w}_{kj}(u) - w_{kj}(u) \} w_{ki}(u) dN_{ki}(u) + O_p(1/s).$$

Now write

$$\begin{aligned} \widehat{w}_{kj}(u) - w_{kj}(u) &= I(C_{kj} \geq T_{kj} \wedge u) \left\{ \frac{\widehat{G}(u)}{\widehat{G}(X_{kj})} - \frac{G(u)}{G(X_{kj})} \right\} \\ &= -I(X_{kj} < u) w_{kj}(u) \int_{X_{kj}}^u \frac{dM_{\bullet}^c(y)}{nY^c(y)} + o_p(1), \end{aligned}$$

where  $Y^c(y) = \frac{1}{n} \sum_{j=1}^n I(X_j \geq y) \rightarrow \pi(y)$  and  $M^c(y) = I(X \leq y, \Delta = 0) - \int_0^y I(X \geq t) d\Lambda^c(t)$

is the martingale associated with the censoring process. Since we assume no strata effect on the censoring process, a single index can be used, such that  $M_{\bullet}^c(y) = \sum_{l=1}^n M_l^c(y)$ .

This gives

$$\begin{aligned} \mathbf{H}(\boldsymbol{\beta}_0, t) &= s^{-1} \sum_{k=1}^s \sum_{i=1}^{n_k} \int_0^t \sum_{j=1}^{n_k} \mathbf{A}_{kj}(\boldsymbol{\beta}_0, u) I(X_{kj} < u) w_{kj}(u) \int_{X_{kj}}^u \frac{dM_{\bullet}^c(y)}{nY^c(y)} w_{ki}(u) dN_{ki}(u) + O_p(1/s) \\ &= s^{-1} \sum_{k=1}^s \sum_{i=1}^{n_k} \int_0^t \sum_{j=1}^{n_k} \mathbf{A}_{kj}(\boldsymbol{\beta}_0, u) w_{kj}(u) \int_0^{\infty} I(X_{kj} < y \leq u) \frac{dM_{\bullet}^c(y)}{nY^c(y)} w_{ki}(u) dN_{ki}(u) + O_p(1/s) \\ &= n^{-1} \int_0^{\infty} s^{-1} \sum_{k=1}^s \sum_{i=1}^{n_k} \sum_{j=1}^{n_k} \int_0^t \mathbf{A}_{kj}(\boldsymbol{\beta}_0, u) I(X_{kj} < y \leq u) w_{kj}(u) w_{ki}(u) dN_{ki}(u) \frac{dM_{\bullet}^c(y)}{Y^c(y)} + O_p(1/s). \end{aligned}$$

Accordingly,  $\mathbf{H}(\boldsymbol{\beta}_0, \infty) = n^{-1} \sum_{l=1}^n \int_0^{\infty} Y^c(y)^{-1} \mathbf{Q}(\boldsymbol{\beta}_0, y) dM_l^c(y) + O_p(1/s)$ , where

$$\mathbf{Q}(\boldsymbol{\beta}_0, y) = s^{-1} \sum_{k=1}^s \sum_{i=1}^{n_k} \sum_{j=1}^{n_k} \int_0^{\infty} \mathbf{A}_{kj}(\boldsymbol{\beta}_0, u) I(X_{kj} < y \leq u) w_{kj}(u) w_{ki}(u) dN_{ki}(u).$$

Since  $\{N_{ki}, Y_{ki}, Z_{ki}, i = 1, \dots, n_k, n_k\}, k = 1, \dots, s$  are i.i.d. for highly stratified data,

$$\mathbf{Q}(\boldsymbol{\beta}_0, y) \rightarrow \mathbf{q}(y) = \mathbb{E} \left[ \sum_{i=1}^{n_k} \sum_{j=1}^{n_k} \int_0^t \mathbf{A}_{kj}(\boldsymbol{\beta}_0, u) I(X_{kj} < y \leq u) w_{kj}(u) w_{ki}(u) dN_{ki}(u) \right].$$

Let  $\boldsymbol{\psi}_k = \sum_{i=1}^{n_k} \int_0^{\infty} \mathbf{q}(y) / \{\overline{m}\pi(y)\} dM_{ki}^c(y)$ ,  $\mathbf{H}(\boldsymbol{\beta}_0, \infty) = s^{-1} \sum_{k=1}^s \boldsymbol{\psi}_k + O_p(1/s)$ ,  $\boldsymbol{\eta}_k = \widetilde{\mathbf{U}}_{1k}(\boldsymbol{\beta}_0, t)$ .

Then,

$$s^{-1} \mathbf{U}_1(\boldsymbol{\beta}_0, \tau) = s^{-1} \sum_{k=1}^s (\boldsymbol{\eta}_k + \boldsymbol{\psi}_k) + o_p(1),$$

which is approximately a sum of  $s$  i.i.d. distributed random variables. By multivariate central limit theorem,  $s^{-\frac{1}{2}}\mathbf{U}_1(\boldsymbol{\beta}_0, \tau)$  is asymptotically normal with covariance matrix  $\boldsymbol{\Sigma}_h = \text{E}\{(\boldsymbol{\eta}_k + \boldsymbol{\psi}_k)(\boldsymbol{\eta}_k + \boldsymbol{\psi}_k)^T\}$ . This can be estimated empirically by

$$\frac{1}{s} \sum_{k=1}^s (\hat{\boldsymbol{\eta}}_k + \hat{\boldsymbol{\psi}}_k)^{\otimes 2},$$

where  $\hat{\boldsymbol{\psi}}_k = \sum_{l=1}^n I(K_l = k) \int_0^\infty \hat{\mathbf{Q}}(\hat{\boldsymbol{\beta}}, y) / \{\overline{m}Y^c(y)\} d\hat{M}_l^c(y)$ . Here  $\hat{M}^c(y)$  is defined analogously to  $M^c(y)$  with  $\Lambda^c(t)$  replaced by  $\hat{\Lambda}^c(t)$ , and  $\hat{\mathbf{Q}}(\hat{\boldsymbol{\beta}}, y)$  is defined analogously to  $\mathbf{Q}(\boldsymbol{\beta}, y)$ , with  $\tilde{\mathbf{Z}}$  replaced by  $\hat{\mathbf{Z}}$  and  $w_{ki}$  replaced by  $\hat{w}_{ki}$ . Further,  $\hat{\Lambda}_j^c(t) = \int_0^t \{nY^c(u)\}^{-1} \sum_{l=1}^n dI(X_l \leq u, \Delta_l = 0)$  and  $\hat{\boldsymbol{\eta}}_k$  is defined analogously to  $\tilde{\mathbf{U}}_{1k}(\boldsymbol{\beta}, \tau)$ , with  $\tilde{\mathbf{Z}}$  replaced by  $\hat{\mathbf{Z}}$  and  $w_{ki}$  replaced by  $\hat{w}_{ki}$ .
